# Supplementary material for: CD8+CD103+ tissue-resident memory T cells convey reduced protective immunity in cutaneous squamous cell carcinoma
Source: HighWire-hosted journal article supplement (doi:10.1136/jitc-2020-001807), 2021-01-01
Supplement: jitc-2020-001807supp004_data_supplement.pdf [file jitc-2020-001807supp004_data_supplement.pdf]

## Supplementary figure 4

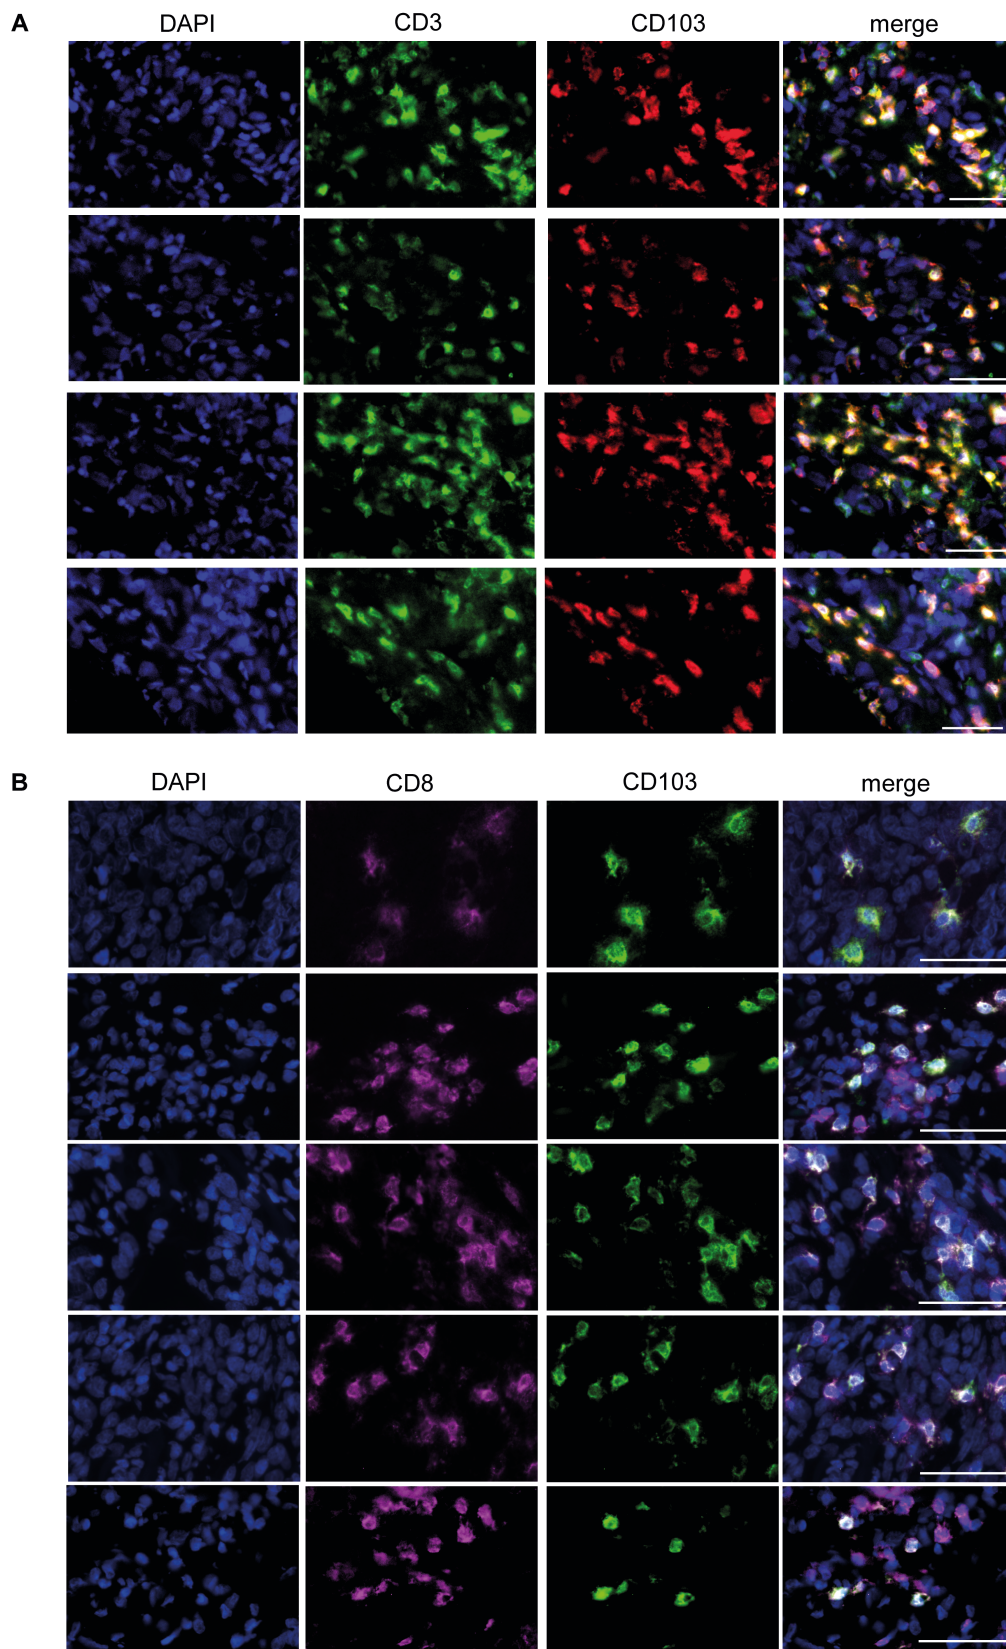

Supplementary Figure 4. Most CD103+ cells in cSCC are CD3+ and CD8+ T cells. Representative immunofluorescence microscopy images of cSCCs showing (A) CD3 and CD103 expression and (B) CD8 and CD103 expression. Scale bars = 50  $\mu$ m.
