# Supplementary material for: CD8+CD103+ tissue-resident memory T cells convey reduced protective immunity in cutaneous squamous cell carcinoma
Source: HighWire-hosted journal article supplement (doi:10.1136/jitc-2020-001807), 2021-01-01
Supplement: jitc-2020-001807supp005_data_supplement.pdf [file jitc-2020-001807supp005_data_supplement.pdf]

## Supplementary figure 5

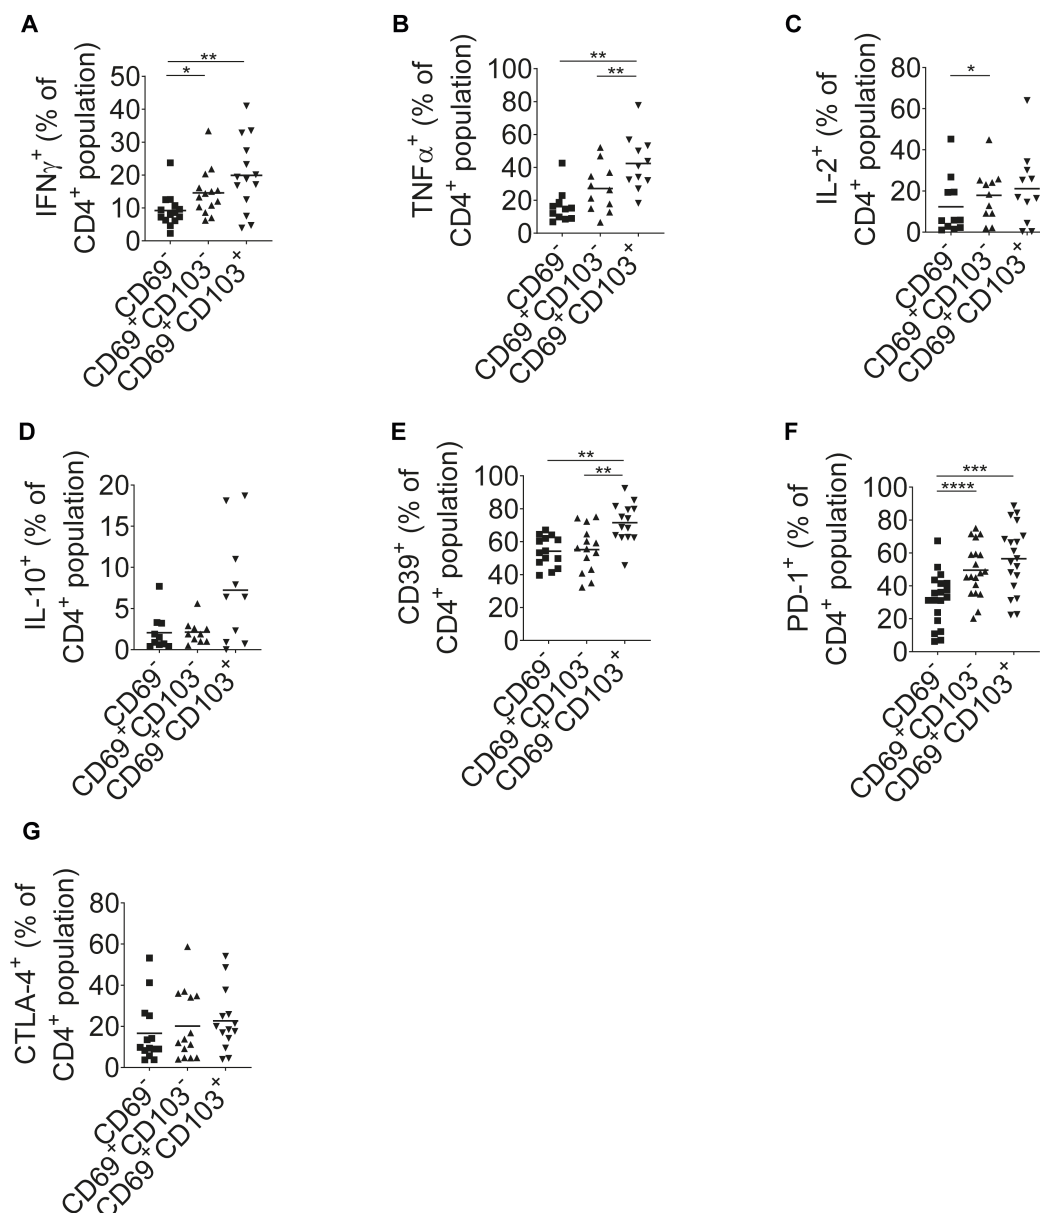

Supplementary Figure 5. Characterization of CD4<sup>+</sup>CD69<sup>+</sup>CD103<sup>+</sup> T cells in cSCC. (A-G) Graphs showing expression of (A) IFN $\gamma$  (n=14 tumors), (B) TNF $\alpha$  (n=11 tumors), (C) IL-2 (n=11 tumors), (D) IL-10 (n=10 tumors), (E) CD39 (n=14 tumors), (F) PD-1 (n=11 tumors) and (G) CTLA-4 (n=14 tumors) by the tumoral CD4<sup>+</sup>CD69<sup>-</sup>, CD4<sup>+</sup>CD69<sup>+</sup>CD103<sup>-</sup> and CD4<sup>+</sup>CD69<sup>+</sup>CD103<sup>+</sup> T cell populations. Expression of cytokines was determined following stimulation in vitro with PMA and ionomycin for 5 hours. Horizontal bars = means, \*p<0.05, \*\*p<0.01, \*\*\*p<0.001, \*\*\*\*p<0.0001.
