# Supplementary material for: CD8+CD103+ tissue-resident memory T cells convey reduced protective immunity in cutaneous squamous cell carcinoma
Source: HighWire-hosted journal article supplement (doi:10.1136/jitc-2020-001807), 2021-01-01
Supplement: jitc-2020-001807supp006_data_supplement.pdf [file jitc-2020-001807supp006_data_supplement.pdf]

## Supplementary figure 6

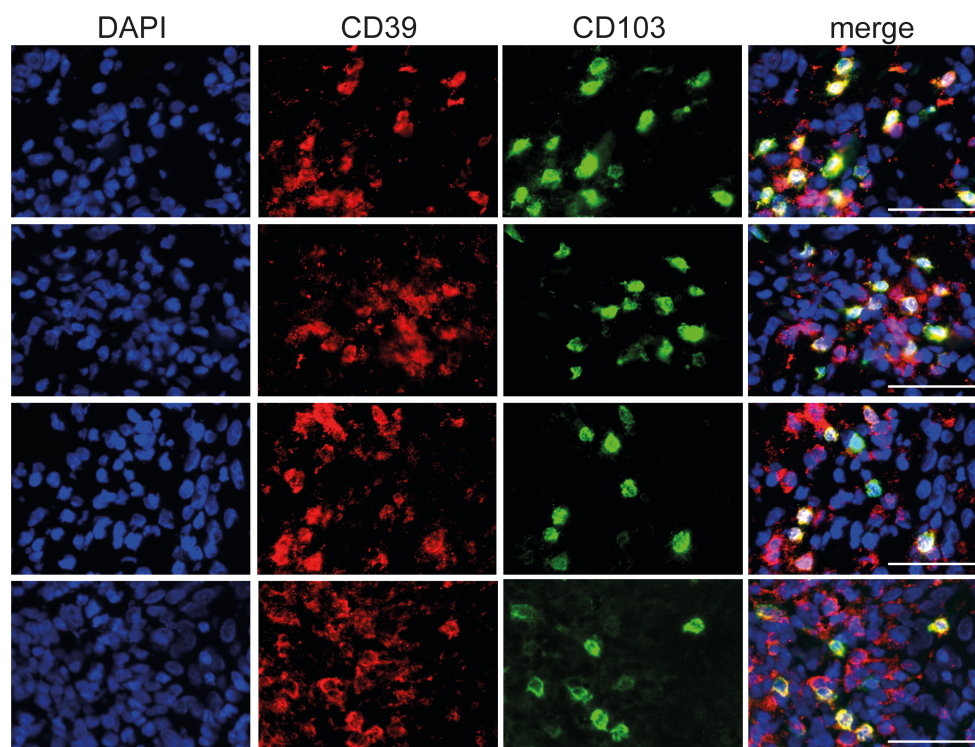

Supplementary Figure 6. Expression of CD39 by CD103+ T cells in cSCC. Representative immunofluorescence microscopy images of cSCC stained for CD103 and CD39. Scale bars = 50  $\mu$ m.
